# Supplementary material for: Characterizing four decades of accelerated glacial mass loss in the West Nyainqentanglha Range of the Tibetan Plateau
Source: Copernicus journal article supplement (doi:10.5194/hess-2022-179), 2022-05-23
Supplement: Supplementary file 1 [file hess-2022-179-supplement.pdf]

## Supplement table captions

Table S1 Datasets used to delineate glacier outline for the WNT (1976-2020)

Table S2 The comparison of previous studies and this study on glacier change over the WNT

Table S3 Comparison of glacier area between this study and study of Wu et al. (2016) in specific years

Table S4 Mass balance (BN) of Zhadang Glacier and Gurenhekou Glacier in this study, and their mass balance derived from in-situ observations.

Table S5 Mass balance estimates (from geodetic and altimetry studies) over the WNT and comparable subregions/catchments.

Table S1 Datasets used to delineate glacier outline for the WNT (1976-2020)

| Data       | Satellite and sensor | Spatial Resolution (m) | Suitability of scene                  | Utilizations                                                                            |
|------------|----------------------|------------------------|---------------------------------------|-----------------------------------------------------------------------------------------|
| 1976/01/07 | Hexagon KH-9         | 8                      | Seasonal snow in the northeast        | Glacier inventory in 1976 for whole study area                                          |
| 1976/12/17 | Landsat MSS          | 30                     | Little seasonal snow in the northeast | Glacier inventory in 1976 for whole study area except for a small part of the southeast |
| 1977/03/17 | Landsat MSS          | 30                     | Some clouds                           | Additional information for glacier of 1976                                              |
| 2000/11/01 | Landsat ETM+         | 30                     | Seasonal snow in the northeast        | Glacier inventory in 2000 for whole study area                                          |
| 2000/11/17 | Landsat ETM+         | 30                     | Seasonal snow in the northeast        | Glacier inventory in 2000 for whole study area                                          |
| 2001/02/05 | Landsat ETM+         | 30                     |                                       | Additional information for glacier of 2000                                              |
| 2014/08/12 | Landsat OLI          | 30                     | Little clouds                         | Glacier inventory in 2014 for whole study area                                          |
| 2014/10/15 | Landsat ETM+         | 30                     | Some stripes                          | Additional information for glacier of 2014                                              |
| 2014/06/17 | Landsat ETM+         | 30                     | Some stripes                          | Additional information for glacier of 2014                                              |
| 2016/08/05 | Sentinel-1           | 2.3x14.1               |                                       | Check debris glacier                                                                    |
| 2016/08/29 | Sentinel-1           | 2.3x14.1               |                                       | Check debris glacier                                                                    |
| 2020/09/29 | Landsat OLI          | 30                     | Little clouds                         | Glacier inventory in 2000 for whole study area                                          |
| 2020/10/15 | Landsat OLI          | 30                     |                                       | Glacier inventory in 2000 for whole study area                                          |

Table S2 The comparison of previous studies and this study on glacier change over the WNT

| Time period  | Region                      | Area change (%) | Data                                            | Method                          | Study                      |
|--------------|-----------------------------|-----------------|-------------------------------------------------|---------------------------------|----------------------------|
| 1970-2000    | Nam Co Basin                | -15.4           | Aero-photo topographic map, Landsat ETM+        | Manual                          | Wu & Zhu (2008)            |
| 1976-2001    | Nam Co Basin                | -6.8±3.1        | Hexagon KH-9, Corona, Landsat MSS/TM/ETM+       | Band ratio and revised manually | Bolch et al.(2010b)        |
| 1970/80-2000 | Southwest of WNT near Lhasa | -19.8           | LandSat Series, ASTER,                          | Band ratio                      | Franenfelder & Käab (2009) |
| 1977-2000    | Southwest of the WNT        | -15.6±3.27      | Hexagon KH-9, Landsat MSS/TM/ETM+               | Band ratio and revised manually | Wang et al. (2012)         |
| 2000-2010    |                             | -8.11±3.09      |                                                 |                                 |                            |
| 1970-2000    | The WNT                     | -5.7            | Aero-photo topographic map, Landsat ETM+, ASTER | Manual                          | Shangguan et al. (2008)    |
| 1970-2000    | The WNT                     | -11.7 ±3.6      | Chinese Topographic Maps, Landsat TM/ETM+       | Band ratio and revised manually | Wu et al. (2016)           |
| 2000-2014    |                             | -17.8±4.9       |                                                 |                                 |                            |
| 1976-2000    | The WNT                     | -12.98±4.91     | Hexagon KH-9, Landsat MSS/ETM+/OLI              | Band ratio and revised manually | This study                 |
| 2000-2014    |                             | -15.78±5.91     |                                                 |                                 |                            |

Table S3 Comparison of glacier area between this study and study of Wu et al. (2016) in specific years

|                  | Glacier Area (km <sup>2</sup> ) |              |              |              |              |
|------------------|---------------------------------|--------------|--------------|--------------|--------------|
|                  | 1970                            | 1976         | 2000         | 2014         | 2020         |
| Wu et al. (2016) | 892.61±17.76                    | -            | 788.47±25.59 | 648.23±23.54 | -            |
| This study       | -                               | 884.90±29.71 | 770.03±33.44 | 648.55±30.88 | 589.17±31.72 |

Table S4 Mass balance ( $B_N$ ) of Zhadang Glacier and Gurenhekou Glacier in this study, and their mass balance derived from in-situ observations.

| Name       | 1976-2000 $B_N$<br>(m w.e.a <sup>-1</sup> ) | 2000-2020 $B_N$<br>(m w.e.a <sup>-1</sup> ) | in-situ $B_N$<br>(m w.e. a <sup>-1</sup> ) |
|------------|---------------------------------------------|---------------------------------------------|--------------------------------------------|
| Zhadang    | -0.25±0.99                                  | -0.55±1.18                                  | -0.59                                      |
| Gurenhekou | -0.27±1.39                                  | -0.42±1.29                                  | -0.31                                      |

Table S5 Mass balance estimates (from geodetic and altimetry studies) over the WNT and comparable subregions/catchments.

| Time period | Mass balance<br>(m w.e.a <sup>-1</sup> ) | Data                                                | Study                |
|-------------|------------------------------------------|-----------------------------------------------------|----------------------|
| 1976-2000   | -0.25±0.15                               | KH-9 and SRTM                                       | Zhou et al. (2018)   |
| 2003-2009   | -0.20±0.29                               | ICESat                                              | Neckel et al. (2014) |
| 2000-2013   | -0.22±0.23                               |                                                     |                      |
| 2013-2017   | -0.43±0.06                               | SRTM and ZiYuan-3 Three-Line-Array<br>stereo images | Ren et al. (2020)    |
| 2000-2017   | -0.30±0.19                               |                                                     |                      |
| 2000-2014   | -0.24±0.13                               | SRTM and TerraSAR-X/TanDEM-X images                 | Li & Lin (2017)      |
| 2000-2014   | -0.26± 0.06                              | SRTM and TerraSAR-X/TanDEM-X images                 | Zhang & Zhang (2017) |
| 1976-2000   | -0.26±0.09                               | KH-9 and SRTM                                       |                      |
| 2000-2014   | -0.28±0.15                               | ASTER DEMs                                          | This study           |
| 2000-2020   | -0.37±0.15                               | ASTER DEMs                                          |                      |

### Supplement figure captions

Figure S1 (a) Coverage of KH-9 image and the number of valid ASTER DEMs after cloud and outlier removal in the buffered area shown. Label I represents the SW section and label II represents the NE section of the WNT (inset, same map scale). (b) and (c) show the total area of glaciers and glacier area covered by the datasets respectively during 1976-2000 and 2000-2020.

Figure S2 After alignment-correction and elevation related deviation correction, elevation change of stable terrain varies with elevation, slope, and aspect during (a), (b) and (c) 1976-2000 and (d), (e) and (f) 2000-2020.

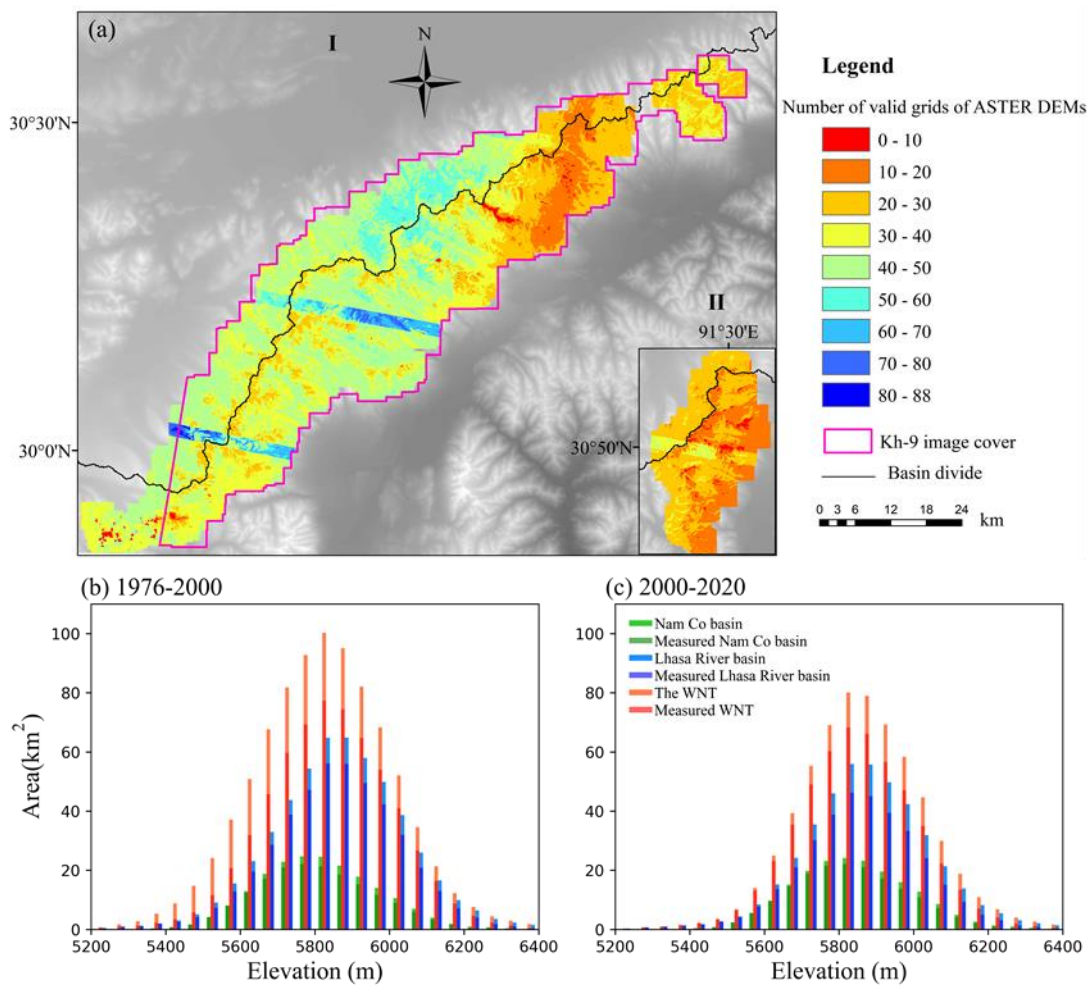

Figure S1 (a) Coverage of KH-9 image and the number of valid ASTER DEMs after cloud and outlier removal in the buffered area shown. Label I represents the SW section and label II represents the NE section of the WNT (inset, same map scale). (b) and (c) show the total area of glaciers and glacier area covered by the datasets respectively during 1976-2000 and 2000-2020.

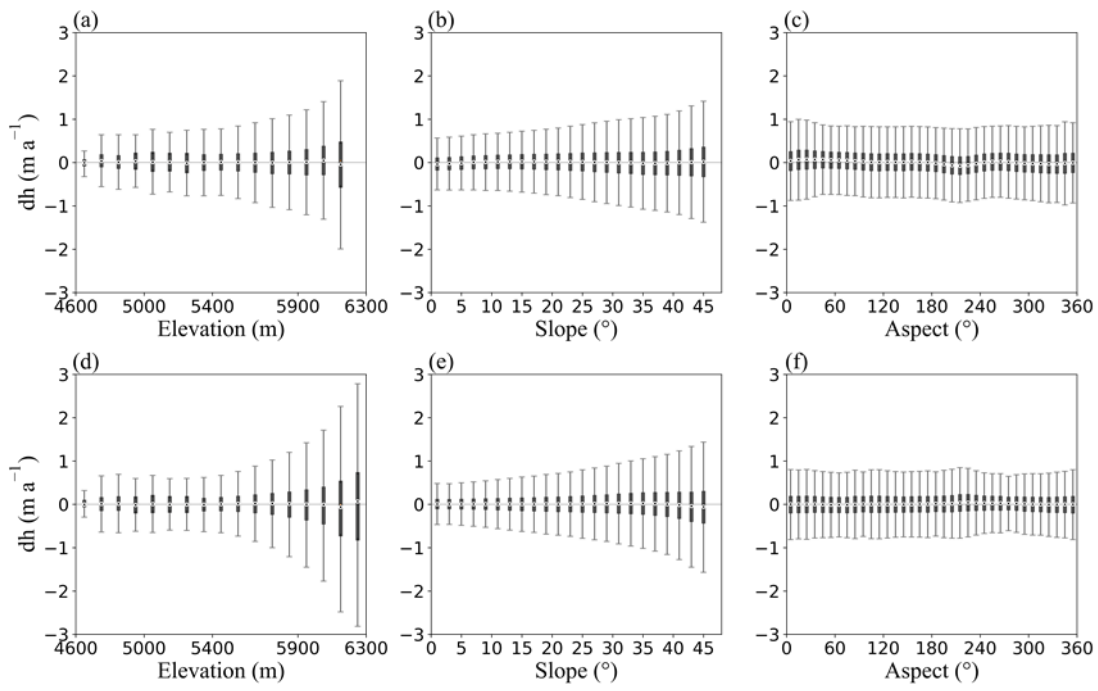

Figure S2 After alignment-correction and elevation-related deviation correction, elevation change of stable terrain varies with elevation, slope, and aspect during (a), (b) and (c) 1976-2000; and (d), (e) and (f) 2000-2020.
