# Supplementary material for: Characterizing four decades of accelerated glacial mass loss in the West Nyainqentanglha Range of the Tibetan Plateau
Source: Copernicus journal article supplement (doi:10.5194/hess-2022-179), 2022-05-23
Supplement: Supplementary file [file hess-2022-179-AC3-supplement.zip]

---

1 Characterizing ~~the four decades of~~ accelerated ~~mass-glacier mass~~ loss ~~of in the western-~~  
2 West Nyainqentanglha Range of the Tibetan Plateau  
3 ~~glaciers over the past 40 years~~

4 Shuhong Wang<sup>1,2,3</sup>, Jintao Liu<sup>1,2\*</sup>, Hamish D. Pritchard<sup>3</sup>, Linghong Ke<sup>2</sup>, Xiao Qiao<sup>1,2</sup>, Jie  
5 Zhang<sup>1,2</sup>, Weihua Xiao<sup>4</sup>, Yuyan Zhou<sup>4</sup>

6 <sup>1</sup>State Key Laboratory of Hydrology-Water Resources and Hydraulic Engineering, Hohai  
7 University, Nanjing 210098, People's Republic of China.

8 <sup>2</sup>College of Hydrology and Water Resources, Hohai University, Nanjing 210098, People's  
9 Republic of China.

10 <sup>3</sup>British Antarctic Survey, Cambridge, CB3 0ET, UK.

11 <sup>4</sup>State Key Laboratory of Simulation and Regulation of Water Cycle in River Basin, China  
12 Institute of Water Resources and Hydropower Research, Beijing 100038, China.

13 \* Correspondence: jtliu@hhu.edu.cn; Tel.: +86-025-83787803

14 **Abstract:**

15 Glacier retreat is ~~changing-altering~~ the water regime of the Tibetan Plateau (TP) as the  
16 region's climate changes, but there remain substantial gaps in quantification of regional glacier  
17 loss due to the difficulty of making ~~-~~ direct high-mountain observations. Here, we assess ~~404~~  
18 years of changes in the glaciers of the West Nyainqentanglha Range (WNT) that supply  
19 meltwater to the densely populated Lhasa River basin and Nam Co, the second largest  
20 endorheic lake on the TP. We mapped glacier extent in 1976, 2000, 2014, and 2020 based on  
21 Landsat MSS/ETM+/OLI scenes and quantified changes in ice thickness during the intervals  
22 1976–2000 and 2000–2020 using declassified KH-9 images, the Shuttle Radar Topography

Mission DEM (2000), and modern stereo satellite imagery. Results show that the glacier areal retreat rate more than doubled between the periods 1976-2000 and 2000 to 2020, from  $-0.54 \pm 0.21 \text{ \% a}^{-1}$  to  $-1.17 \pm 0.30 \text{ \% a}^{-1}$ . Similarly, the glaciers experienced an acceleration in surface lowering, with thickness change of  $-0.26 \pm 0.09 \text{ m w.e.a}^{-1}$  increasing to  $-0.37 \pm 0.15 \text{ m w.e.a}^{-1}$  between these two periods, with particularly intense melting after 2014. This supports previous less comprehensive studies that indicated accelerating mass loss. On average, steeper slopes were associated with faster areal retreat but slower thinning rates, while the influence of aspect on retreat and thinning was inconsistent through time. The spatial and temporal heterogeneity of glacier change can likely be explained by local variations in precipitation and temperature in this region, an apparent reduction in the melt-reducing role of debris cover, and an increasing influence of ice marginal lakes on glacier retreat. Results show that the glacier areal retreat rate during 2000 to 2020 ( $-1.17 \pm 0.30 \text{ \% a}^{-1}$ ) was more than twice that from 1976 to 2000 ( $-0.54 \pm 0.21 \text{ \% a}^{-1}$ ). Similarly, our geodetic glacier mass balance observation of  $-0.37 \pm 0.15 \text{ m w.e.a}^{-1}$  from 2000-2020 compared to  $-0.26 \pm 0.09 \text{ m w.e.a}^{-1}$  from 1976 to 2000 support previous but less comprehensive studies that indicate accelerating mass loss over this period, and we identify particularly intense melting after 2014. The spatial and temporal heterogeneity of glacier change can likely be explained by local variations in precipitation and temperature in this region, an apparent reduction in the melt reducing role of debris cover, and an increasing influence of ice marginal lakes on glacier retreat in the 2000-2020 relative to 1976-2000. Additionally, on average across the glacier population, steeper slopes were associated with faster areal retreat but slower thinning rates, while the influence of aspect retreat and thinning was inconsistent through time.

---

## 1. Introduction

The Tibetan Plateau (TP), known as the “Water Tower of Asia”, is the source of several of Asia’s major rivers (Bolch et al., 2010) and. Glacial melt on the TP plays an important role in water supply for downstream populations, agriculture and industries in along these rivers (Pritchard, 2019; Viviroli et al., 2007). Recent decades Climate change over recent decades have boosted river discharge by increasing runoff from shrinking glaciers (Lin et al., 2020; Yao et al., 2007; Zhang et al., 2011), but this boost will eventually decrease as glacier area declines (Zhao et al., 2019). The sensitivity of ice loss to climate change is variable, however, and often poorly known, however, being a function of glacier size, hypsometry, aspect, debris cover, and the presence of proglacial lakes and ice cliffs, for example. Combined with uncertainties in ice thickness and future climate scenarios, the timing of peak water runoff and the rate of the its subsequent decline in runoff remains a key unknowns (Maurer et al., 2019; Su et al., 2016; Zhao et al., 2019). It is therefore therefore remains critical to monitor and analyze glacier change to improve our understanding of its climate drivers, and to assess its impacts on glacier-fed river basins.

The WNT, in the south-eastern TP (Figure 1), is located in the transition zone between the two large-scale atmospheric circulation patterns characterized respectively by dominant westerlies and the Indian summer monsoon. It holds an abundance of glaciers and glacier-fed lakes, notably Nam Co Lake (Figure 1) in the northwest of the WNT, whose rising water levels indicate a water imbalance primarily due to where recently intensified glacier melting of glaciers in the WNT is the main reason for the rising water levels (Bolch et al., 2010), as supported by mass balance data from Zhadang Glacier and other hydrological observations

from 2007 to 2011 (Zhou et al., 2013). The number and area of supraglacial lakes (of >0.0036 km<sup>2</sup>) in the WNT also increased between 1976 and 2018 by 56% and 35% respectively due to the increase in glacial meltwater (Luo et al., 2020). Furthermore, Zhou et al. (2013) revealed a water imbalance in Nam Co Basin based on the measured mass balance data of Zhadang Glacier and other hydrological observation data from 2007 to 2011. In the relatively densely-populated Lhasa Basin located on the TP into the southeast of WNT, Lin et al. (2020) found that a water imbalance also existed using the first and second Chinese Glacier Inventory in 1960 and 2009. Despite these extensive changes and large affected population, logistical limitations constraints have meant that in situ glacier mass balance records are biased-limited towards a few low-lying, small glaciers that are unlikely to be representative of the broader region (Kääb et al., 2012; Li & Lin, 2017; Yao et al., 2012). Similarly, The glacier volumes in the Chinese Glacier Inventory which was were primarily calculated indirectly by from area-volume scaling formula, and limited direct observations lead larger mean that these volume have large uncertainty (Bahr et al., 1997; Bahr et al., 2015). Detailed investigation of the WNT glacier area change and mass balance on a longer time scale is therefore a high priority.

Compared with the interpolation of sparse in-situ measurements, satellites can observe glacier change over much larger areas of remote terrain (Wang et al., 2021). In recent years, our understanding of the state of TP glaciers has been greatly improved by the increasing coverage and accuracy of multi-source remote sensing observations of glacier area, volume and mass change from KH-9 (Hexagon military satellites), Landsat, ASTER, ICESat (Ice, Cloud, and land Elevation Satellite) altimetry mission, the GRACE gravimetry mission, and other Digital Elevation Models (DEMs) constructed by geodetic techniques, and from GRACE

89 [gravimetry](#) ( Guo et al., 2015; Käb et al., 2012; Wang et al., 2021; Zhou et al., 2018). Based  
90 on the KH-9 images and SRTM, for example, Zhou et al. (2018) found that [from the mid-1970s](#)  
91 [to 2000](#), glaciers in the northwest TP [thinned at](#)  $(-0.11 \pm 0.13 \text{ m w.e. a}^{-1} \text{ to } 0.02 \pm 0.10 \text{ m w.e.}$   
92  $\text{a}^{-1})$  ~~have thinned less rapidly than~~ [while](#) those in the southeast ~~part-thinned faster, at~~  $(-0.30$   
93  $\pm 0.12 \text{ m w.e. a}^{-1} \text{ to } -0.11 \pm 0.14 \text{ m w.e. a}^{-1})$  ~~from the mid-1970s to 2000~~. Brun et al. (2018)  
94 employed ASTER DEMs [from 2000 to 2016](#) and showed that glacier mass balances ~~in~~ High  
95 Mountain Asia ~~vary-ranged~~ from  $-0.62 \pm 0.23 \text{ m w.e. a}^{-1}$  in eastern Nyainqentanglha to  $+0.14 \pm$   
96  $0.08 \text{ m w.e. a}^{-1}$  in the Kunlun ~~Mountains, and averaged~~ [-0.14  \$\pm\$  0.14 over the large Inner TP](#)  
97 [that includes WNT](#). Maurer et al. (2019) found a doubling of the [Himalayan](#) average loss rate  
98 ~~during between the periods 1976–2000~~  $(-0.22 \pm 0.13 \text{ m w.e. a}^{-1})$  ~~and 2000–2016~~  $(-0.43 \pm 0.14$   
99  $\text{m w.e. a}^{-1})$  ~~compared to 1976–2000~~  $(-0.22 \pm 0.13 \text{ m w.e. a}^{-1})$  using KH-9 and ASTER DEMs.  
100 These studies showed that glacier changes on [and around](#) the TP have marked spatial and  
101 temporal heterogeneity, likely associated [in part](#) with variable glacial sensitivity to climate  
102 change on local scales (Brun et al., 2018,2019; Ke et al., 2020; Maurer et al., 2019; Yao et al.,  
103 2012).

104 Detailed, spatially-comprehensive and long-running observations of area and volume  
105 change for the WNT are still lacking, however, resulting in many gaps in our knowledge and  
106 ~~our~~ understanding of regional glacier behaviours, and considerable uncertainty in predicting  
107 future glacier area and volume and their runoff yield (Bhattacharya et al., 2021; Immerzeel et  
108 al., 2020; Maurer et al., 2019).

109 Investigations of the WNT glacier area have so far focused on the period before 2014  
110 ( Bolch et al., 2010; Wu et al., 2016). For glacier mass balance, most studies focus on after

设置了格式: 英语(英国)

---

2000 (Li & Lin, 2017; Neckel et al., 2014; Ren et al., 2020; Zhang & Zhang, 2017). There are limited discussions on [local](#) glacier changes in the WNT region ~~at local scales from~~ before 2000, although Zhou et al. (2018) included this area in his study of glacier mass balance on the TP and its surroundings from the mid-1970s to 2000. Furthermore, the warming rate of the TP is ~~spatial-temporally~~ heterogeneous [both spatially and temporally](#) in recent decades (Duan & Xiao, 2015; Wu et al., 2015). Under a changing runoff regime (Lin et al., 2020), the lack of a detailed survey of glacier changes over a long time scale is a major impediment to water resource management and decision-making (Lutz et al., 2014).

The key purpose of this study is therefore to provide an internally consistent dataset of glacier area and mass change in the WNT over the past 44 years. We have compiled a complete glacier inventory in the years 1976, 2000, 2014 and 2020 with the Landsat and KH-9 images, and quantified the geodetic glacier mass balance during 1976–2000 and 2000–2020 with DEMs derived from KH-9, ASTER and SRTM3.0. We report area and mass changes for periods 1976 to 2000 and from 2000 to 2020, and examine the influence of topographic, climatic and glaciological factors on ~~observed area and mass~~[these](#) changes.

## 2. Materials and methods

### 2.1 Study area

The WNT range mountain range has a mean slope of  $15^{\circ}$  and ~~its~~ elevations spanning 4150–7125 m, with an average of 4930 m in the whole region. Its ~~230 km long~~ primary mountain ridge runs [230 km](#) in a southwest–northeast direction, ~~and is~~ bounded by the Nam Co basin to the north and the Lhasa River basin to the south (Yao et al., 2010). ~~The~~ Nam Co Lake, the second largest after Selin Co Lake on the TP, is mainly fed by glacier meltwater (Luo

et al., 2020; Zhang et al., 2017). The Lhasa River basin [to the southeast is](#), a major branch of the Yarlung Zangbo River [and](#), forms part of the route taken by the warm and humid monsoon airflow [into](#) the plateau, making it warmer and wetter than the Nam Co basin (Luo et al., 2020). The annual air temperature and precipitation in the WNT range from  $-0.6^{\circ}\text{C}$  to  $2.8^{\circ}\text{C}$  and 37 mm to 500 mm, respectively (Yu et al., 2013).

Being in a climatic transition zone, the glaciers in this area range from the maritime-influenced glaciers of Gangrigabu (southeast TP), ~~glaciers of the~~ [subcontinental](#) and ~~to~~ [continental-type](#) glaciers of the Tanggula mountains (Li & Lin, 2017). There are 845 glaciers covering 675.85 km<sup>2</sup> and 15 debris-covered glaciers with a total area of 71.74km<sup>2</sup> (10.61% of the total glacier area in the WNT-) (RGI 6.0) (RGI Consortium, 2017). Of these, only the small, [~3km<sup>2</sup>](#) Zhadang and Gurenhekou glaciers ~~covering ~3km<sup>2</sup>~~ (red polygon in Figure 1), have in-situ observations [available to validate the satellite observations, and these run from between 2005 and to 2010](#) (Yao et al., 2012), ~~which are available to validate the satellite observations.~~

## 2.2 Methods and data

### 2.2.1 Glacier outlines

We identified glacier boundaries mainly from Landsat MSS/ETM+/OLI scenes from ~~different various~~ years (Table 1), [orthorectified automatically by the USGS using the level 1T SRTM3 DEM](#). ~~The scenes were available from the United States Geological Survey (from http://glovis.usgs.gov/) and are orthorectified automatically by the USGS using the SRTM3 DEM (level 1T).~~ We selected high-quality images with minimal cloud and snow coverage between June and November and used a semi-automated approach with a TM3/TM5 band ratio

( $2.0 \pm 0.2$ ) to produce glacier outlines. This method is widely used and ~~mostly~~ appropriate for glacier mapping ~~in over~~ larger study areas (Guo et al., 2015; Ye et al., 2017). We used a  $3 \times 3$  median filter to eliminate ~~pixels that are~~ isolated ~~pixels and therefore probably usually likely to~~ have been misclassified due to debris or boulders on the glacier (Bolch et al., 2010). We manually checked and edited the glacier outlines, including the debris-covered glaciers, with height change maps and a coherence map formed by Sentinel-1 images observed on 2016-08-05 and 2016-08-29, to help distinguish debris-covered ice from ice-free areas. Finally, referring to the second glacier inventory, we assigned contiguous ice masses to drainage basins in order to obtain a glacier inventory.

## 2.2.2 Glacier elevation change

We used the KH-9 images and ~~the~~ SRTM DEM (version 3) to estimate glacial elevation changes for the period 1976 to 2000, and ASTER DEMs for the period 2000-2020.

### 2.2.2.1 DEM data

The declassified KH-9 images were obtained by the Hexagon mission from 1971 to 1986, with a ground resolution ~~ranging from of~~ 6 to 9 m (Surazakov & Aizen, 2010), ~~and images were declassified by the United States Geological Survey (USGS) in 2002~~. We downloaded images from 1976-01-07 via the Earth Explorer user interface (<https://earthexplorer.usgs.gov>) and adopted the Hexagon Imagery Automated Pipeline method to generate digital elevation models. This method is coded in MATLAB and uses the OpenCV library for Oriented FAST and Rotated BRIEF (ORB) feature matching, uncalibrated stereo rectification, and semiglobal block matching algorithms (Maurer & Rupper, 2015).

The SRTM mission carried out in February 2000 produced two types of DEM datasets,



---

the C-band DEM with a coverage range of 60°N ~ 60°S and the X- band DEM with a smaller coverage. We used version 3 of the C-band SRTM DEM (<https://earthexplorer.usgs.gov/>) at 1-arc-second resolution (about 30 m) in our primary processing and masked out areas with gaps in the unfilled SRTM3 version 2.1 DEM at 3-arc[second](#) resolution (about 90 m).

The ASTER instrument was launched on the Terra satellite in December 1999 and a single DEM covers approximately 3600 km<sup>2</sup>. We downloaded 250 ‘Data1. l3a.demzs’ ASTER DEMs at 30 m resolution in geotiff format with cloud coverage of less than 40% from the METI AIST Data Archive System (MADAS) satellite data retrieval system (<https://gbank.gsj.jp/madas>). After cloud and outlier removal we fitted a linear regression through the time series of co-registered ASTER DEMs and set the minimum stack interval per pixel to 15 years to estimate the rate of elevation change for each 30-m pixel (Maurer et al., 2019).

#### 2.2.2.2. Co-registration and bias correction of DEMs

All DEMs were co-registered to the SRTM master DEM using a standard elevation–aspect optimization procedure (Nuth & Kääb, 2011). Then, the elevation correlation deviation of all the DEMs was corrected by a third-order polynomial. In addition, we used a 2km buffer zone around the union of glacier boundaries to define stable (unchanging) terrain for DEM alignment, bias correction and uncertainty calculation. Figure. 2a shows the coverage of the KH-[9](#) images and the number of valid ASTER DEMs grids after removal of clouds and outliers in the buffer. The glacier area covered by the dataset from 1976 to 2000 and from 2000 to 2020 accounted for 70.85% and 81.94% of the total glacier area, respectively (shown in Figure. 2b, c). We used only the area common to both of these datasets to measure elevation change between the 1976-2000 and 2000-2020 periods. After correction for alignment and elevation-[related](#) deviation

correction, apparent elevation changes of over stable terrain (masked glaciers and lakes in square buffer zone) had no-zero change trend with elevation, slope and aspect, as shown in Figure. 3.

#### 2.2.2.3. SRTM Penetration-depth correction

Over the WNT, the average penetration depth of C-band SRTM is  $1.67 \pm 0.53$  m calculated using X- band SRTM DEM as the reference (Li & Lin, 2017). Linear regression between the glacier elevation and penetration showed that the penetration depth varies from 1.29 m to 2 m at altitudes of 5550 m and 6250m respectively (Li & Lin, 2017). We used this more accurate linear, altitude-dependent correction and the result is similar to several other study regions on the TP (Gardelle et al., 2013; Kääb et al., 2012).

#### 2.2.2.4 Glacier mass change

Estimation of average glacier thickness changes based on elevation-difference maps involves noise filtering and glacier-hypsometry-weighted averages, in an approach widely employed in to calculate regional glacier mass balance where glacier thinning is highly dependent on altitude. Firstly, we subjected the thickness-change maps to outlier removal using a  $5 \text{ m a}^{-1}$  threshold. We then masked slopes  $> 40^\circ$ , where uncertainties are large (Figure 3b, c), before visually inspecting the final thickness-change maps. We additionally masked out any remaining anomalous pixels, which occurred almost exclusively in low-contrast, snow-covered accumulation zones. Finally, we separated thickness changes into 50-m elevation bins by referring to the SRTM at different spatial scales, i.e., the whole glacierized area, sub-regions, different glacier types and individual glaciers of area  $> 2 \text{ km}^2$ . In each altitude bin, we filtered out any height-change values that differed by more than three standard deviations from the

median and removed any bins with less than 100 pixels. For elevation bins with no observations (mostly over the low- and high- elevation limits), we assumed zero mean elevation changes. We calculated the mean glacier thickness changes for the spatial unit/group ( $dh$ ) as a hypsometric average:

$$dh = \sum_{i=1}^n \frac{S_i}{S} \cdot \overline{dh_i} \quad (1)$$

where  $i$  and  $n$  denote the  $i^{th}$  50-m elevation bin and the number of total bins respectively,  $S_i$  is the glacier area of the  $i^{th}$  elevation bin,  $S$  is the total glacier area, and  $dh_i$  is the mean  $dh$  in the bin.

We calculated the final geodetic mass balance ( $B$ ) using equation (2).

$$B = dh \times \frac{\rho_{ice}}{\rho_{water}} \quad (2)$$

We translated glacier thickness changes into mass balance by the ratio of column-averaged glacier density,  $\rho_{ice}$  (850 kg m<sup>-3</sup>) to water density ( $\rho_{water}$ , 1000 kg m<sup>-3</sup>).

### 2.2.3 Uncertainty

#### 2.2.3.1 Uncertainty of glacier area

Similar to previous studies (Wu et al., 2016; Ye et al., 2017), we obtained the uncertainty of glacier area ( $\delta_s$ ) using equation (3)

$$\delta_s = L_c E_{pc} + L_d E_{pd} \quad (3)$$

Where  $L_c$  and  $L_d$  represent the lengths of the clean-ice and debris-covered glacier outlines, and  $E_{pc}$  and  $E_{pd}$  denote the positional accuracies. We calculated the uncertainty in glacier area change ( $\delta_{sc}$ ) by combining the area uncertainties using equation (4)

$$\delta_{sc} = \sqrt{(\delta_{s1})^2 + (\delta_{s2})^2} \quad (4)$$

Guo et al. (2015) compared glacier outlines derived from Landsat-images with real-time kinematic differential GPS (RTK-DGPS) measurements and found an average difference of  $\pm 11$  m and  $\pm 30$  m for the delineation of clean and debris-covered ice. Using a buffer size of 10 m for areas from the Hexagon images (Bolch et al., 2010), our combined uncertainty in glacier area is 3.9%, 5.1%, 5.1% and 5.9% in 1976, 2000, 2014, and 2020, respectively.

#### 2.2.3.2 Uncertainty of glacier thickness change

The uncertainty in surface-elevation change derived from ASTER DEMs can ~~then~~ be estimated using the point elevation error ( $E_{pt}$ ) and extrapolation error ( $E_{ext}$ ) (Nuth et al., 2010; Maurer et al., 2016).

$$\delta_{hi} = \sqrt{\left(\frac{E_{pt}}{\sqrt{n_i}}\right)^2 + \left(\frac{E_{ext}}{\sqrt{n_i}}\right)^2} \quad (5)$$

$$n_i = \frac{n_{ib} * r^2}{\pi * d^2} \quad (6)$$

$$\delta_h = \sqrt{\sum_1^z \left(\delta_{hi} * \frac{S_i}{S}\right)^2} \quad (7)$$

Here,  $E_{pt}$  refers to the standard deviations of the relative elevation change over the off-glacier areas,  $E_{ext}$  is the standard deviations of glacial elevation change within each 50-m bin,  $n_{ib}$  and  $n_i$  represent the total number of pixels and the number of independent measurements of pixels respectively,  $r$  is the DEM spatial resolution (30 m in our study), and  $d$  is the autocorrelation length. We used an autocorrelation length of 500 ~~m~~ ~~was employed~~, which is a conservative value based on semivariogram analysis of mountainous regions in previous studies (Brun et al., 2018; Maurer et al., 2019). We combined, the uncertainty of surface-elevation changes derived from the KH-9 DEM ~~and with the the SRTM with the~~ penetration uncertainty, estimated as  $\pm 0.53$  m (Li & Lin, 2017). This study ignored the errors caused by seasonal changes in glacier

thickness due to the lack of observations of such seasonal changes in glacier thickness.

We estimated the overall uncertainty in the total glacier mass change ( $\delta m$ , in kg) by including the uncertainty in the assumed ice/firn/snow density ( $\delta \rho = 60 \text{ kg m}^{-3}$ , which is 7.1% of  $\rho_{ice} = 850 \text{ kg m}^{-3}$ ), errors in glacier area ( $\delta s$ ,  $\text{m}^2$ ) and glacier elevation change ( $\delta h$ , m), using equation (8).

$$\delta_m = \sqrt{(S \cdot dh \cdot \delta_\rho)^2 + (\delta_s \cdot dh \cdot \rho_{ice})^2 + (S \cdot \delta_h \cdot \rho_{ice})^2} \quad (8)$$

#### 2.2.4. Lake data

We identified glacier-marginal lakes as those lying within 50 m of a glacier boundary, using lake data for the 1970s-2018 (Luo et al., 2020; <http://data.tpdc.ac.cn>).

#### 2.2.5. Meteorological data

There are three meteorological stations adjacent to the WNT, at Bange (31°23'N, 90°01'E), Lhasa (29°40'N, 91°08'E), and Damxung (30°29'N, 91°06'E). We obtained Air temperature and precipitation data during 1976-2020 from the Climatic Data Center, National Meteorological Information Center, of the China Meteorological Administration.

We also obtained gridded data of precipitation and temperature with spatial resolution of  $0.1^\circ \times 0.1^\circ$  and 3-h time interval for 1979-2018 from the China Meteorological Forcing Data (Ding et al., 2020; <http://data.tpdc.ac.cn>), which has been widely utilized in land-process and hydrological modelling and other studies (Qiao et al., 2021; Wang et al., 2020, 2021). This dataset is made by fusing the conventional meteorological observation of China Meteorological Administration based on the Princeton reanalysis data, GLDAS data, GEWEX-SRB radiation data, and TRMM precipitation data as the background field (He et al., 2020; Yang et al., 2010).

---

## 3. Results

### 3.1 Glacier area change

There were 921 glaciers with a total area of  $589.17 \pm 31.72 \text{ km}^2$  in 2020 in the WNT (Figure 4a). Small glaciers dominated the number (those  $\leq 1 \text{ km}^2$  occupy 83.17% of the total number) and a large proportion of the area (those  $\leq 1 \text{ km}^2$  occupy 30.42% of the total area). Glaciers larger than  $5 \text{ km}^2$  accounted for 21.39% of the total area and only 1.63% of the total number. Glaciers were mainly distributed in the eastern-oriented zone with an altitude of 5600-6100m and a slope of  $5\text{-}40^\circ$  (Figure 4b, c, d).

Glaciers in the WNT experienced significant retreat ~~changes~~ from 1976 to 2020 and altitude, slope and aspect all appear to have influenced this retreat (Figures 5 and 6). The glacier area decreased by 33.42% from  $884.90 \pm 29.71 \text{ km}^2$  in 1976 to  $589.17 \pm 31.72 \text{ km}^2$  in 2020, with an average annual decrease of  $-0.76 \pm 0.11 \text{ \% a}^{-1}$ . The retreat rate of glacier area in 2000-2020 ( $-1.17\% \text{ a}^{-1}$ ) was more than twice as fast as in 1976-2000 ( $-0.54 \pm 0.21 \text{ \% a}^{-1}$ ) (Figure 6, Table 2). The glacier area ~~receded~~ declined faster in the northeast and southwest, but slower in the middle, except for a few small glaciers with an area of less than  $2 \text{ km}^2$  during 1976-2000. ~~while d~~ During 2000-2020 the glacier area receded faster in the whole region except for a few small glaciers with an area of less than  $1 \text{ km}^2$  (Figure 5). Retreat was greatest in the area classes of  $1\text{-}3 \text{ km}^2$  and  $3\text{-}5 \text{ km}^2$ , and glaciers with significant areal retreat were mainly distributed below 6,000 m ~~la~~ altitude. Glaciers in the Nam Co basin retreated slightly faster than those outside this basin between 2000 and 2020. Retreat was particularly rapidly ~~ly~~ at lower altitudes and decreased ~~d~~ with the increasing of altitude at higher elevations. As for the effect of slope and aspect, glaciers ~~s~~ retreated more rapidly with increasing slope between  $5^\circ$  and  $40^\circ$ , but the retreat

rate decreased as slope increased between 0°-5° and 40°-60°, where relative few glaciers are distributed. During both 1976-2000 and 2000-2020, the retreat rate was smallest on the north-facing slopes. During 1976-2000, retreat was most rapid in the southeast quadrant, while from 2000 to 2020, rapid retreat occurred at similar rates in all aspects other than north and southeast, i.e., the effect of aspect on glacier area retreat varied in space and time.

### 3.2 Geodetic mass balance

Glacier height changes for the past 44 years, are shown in Figure 7. Substantial and near-ubiquitous thinning occurred in the WNT since 1976, with a widespread increase in the most recent decades. From 1976 to 2000, glaciers experienced a mean elevation rate of  $-0.31 \pm 0.10$  m a<sup>-1</sup>; (a water-equivalent to a mean mass loss rate of  $-0.26 \pm 0.09$  m w.e. a<sup>-1</sup>), equating to a mass loss rate of  $-0.24 \pm 0.08$  Gt a<sup>-1</sup>). From 2000 to 2020, the mean elevation rate was  $-0.44 \pm 0.13$  m a<sup>-1</sup>, equivalent to a mean mass loss of  $(-0.37 \pm 0.12$  m w.e. a<sup>-1</sup>), or  $(-0.29 \pm 0.09$  Gt a<sup>-1</sup>). Several glacier tongues have suffered severe thinning, exceeding  $-1.5$  m a<sup>-1</sup> from 1976 to 2000, especially notably several long, debris-free glaciers without debris cover on the southwestern slope. From 2000 to 2020, the range of glacier tongues with losses exceeding losses of  $1.5$  m a<sup>-1</sup> expanded, and the glacier losses was were greater in the north-eastern WNT (see, the red rectangular box in Figure 7). In both 1976-2000 and 2000-2020, the glacier lowering thinning rate was slightly higher inside the Nam Co drainage basin than outside it (Table3, Figure. 8), though these rates do not differ by more than their combined uncertainties.

For glaciers with an area of more than 2 km<sup>2</sup>, we found that the spatial distribution of mass change was broadly similar for the periods 1976-2000 and 2000-2020 (Figure 9), with high loss rates in the northeast, followed by the southwest, and moderate in the middle. Mass loss

was substantially more intense in 2000-2020, however. In this period, only a very small number of glaciers with were in a state of positive balance (Figure 8, blue dots) and loss from some glaciers in the northeast exceeded  $-0.6 \text{ m w.e. a}^{-1}$ .

Finally, glacier elevation change as a function of elevation, slope and aspect are shown in Figure 10. Elevation is inversely correlated with thickness change, while slope and aspect appear to have a weak relationship with thickness change. In both 1976-2000 and 2000-2020, the elevation change rate was the largest at lower altitudes, and gradually decreased with the increasing of altitude. The thinning rate also exhibited a weak inverse relationship with slope, becoming somewhat stronger in the 2000-2020 period. For the impact of aspect, thinning for 1976-2000 was most rapid in the south-west and north-west quadrants, but by 2000-2016, high thinning rates were affecting all aspects, i.e., the effect of aspect on thinning rates also varied through time.

### 3.3 The effect of debris-cover and proglacial lakes on glacier mass changes

In our WNT study area, there are five debris-covered glaciers, covering  $55.42 \pm 1.25 \text{ km}^2$  in 1976 and  $51.59 \pm 1.77 \text{ km}^2$  in 2000. Lake-terminating glaciers occupied a similar proportion, with area of  $70.29 \pm 2.69 \text{ km}^2$  in 1976, and  $49.60 \pm 1.82 \text{ km}^2$  in 2000. Only one glacier was both covered by debris and terminated in a pro-glacial lake.

The thinning rate of different types of glaciers varied ~~slightly-somewhat, though with despite the~~ greater uncertainty ~~given the relatively small sample for debris cover and lake terminating glacier due to the small sampling area.~~ (Figure 11, Table 4). During 1976-2000, the lake-terminating glaciers thinned more rapidly, followed by the regular ~~and glaciers and the debris-covered and lake terminating glacier types~~ which thinned slower in the most elevation



bins. However, from 2000 to 2020, the ablation rate of debris-covered glaciers was slightly lower than that of regular glaciers at low altitudes, but progressively greater than that of regular glaciers at higher altitudes, leading to a slightly more negative total mass balance for the debris-covered type. In the same period, the thinning of lake-terminating glaciers continued to be greater than that of regular glaciers during 2000–2020. Our results indicate that debris cover in the WNT suppressed glacier thinning to some extent and enabled the debris-covered ice to survive at much lower elevations than adjacent clean ice glaciers. In contrast, a glacial lake at the end of a glacier accelerated its retreat, and this feature was more pronounced at lower elevations.

## 4. Discussion

### 4.1 Comparison to previous studies

#### 4.1.1 Glacier area change

Based on space-borne imagery, we found that glacier area in the west Nyainqentanglha Range (WNT) has changed by -13.0% from 1976 to 2000 and -23.5% from 2000 to 2020. The comparison between our study and previous studies is shown in Tables 5 and 6. Differences between studies may have arisen from the georeferencing errors in the areas for 1970 used by Shangguan et al. (2008) and Wu & Zhu (2008) which came from the Chinese Glacier Inventory (CGI) based on the Chinese topographic maps (Frauenfelder & Kääb, 2009). Although obvious errors in the CGI were omitted in their change analysis, the remaining glaciers were not corrected (Frauenfelder & Kääb, 2009). Discrepancies may also have arisen from differences in the methods used to distinguish glaciers from seasonal snow, and debris-cover glaciers from neighboring moraine or rock slopes (Bolch et al., 2010). Compared to the glacier area change

~~in~~between 1970-2000 and 2000-2014 ~~from the study~~ of Wu et al. (2016), and ~~in~~between 1977-2000 and 2000-2010 ~~from of~~ Wang et al. (2012), our results agree within the uncertainties over the whole WNT, and the southeast ~~of~~ WNT, respectively. In addition, the 789.15 km<sup>2</sup> area reported for the WNT by RGI V4.0 which used Landsat images obtained on 2001-12-06 agrees with and our result.

#### 4.1.2 Glacier mass balance.

#### 4.1.2 Glacier mass balance

Field measurements of mass balance are available from small glaciers Zhadang glacier for 2005-2008, and ~~between 2005 and 2010 for~~ Gurenhekou glacier for 2005-2010, on the southeastern slope of the WNT (Table 7). Although the period of our study is longer and ~~the bigger uncertainty due to the small~~ provides a much larger sample size, the mass balance results are similar to these field measurements.

Previous studies have also reported region-averaged glacier mass balance ~~of over~~ a similar spatial extent to ours, obtained from DEMs using various sensors (Table 8). Our results during 2000-2020 are more negative than those of Neckel et al. (2014), Li & Lin (2017) and Zhang & Zhang (2017), but agree within the uncertainties over comparable time periods, even though these studies differ in data processing, glacier mask, penetration correction and data coverage. For comparison, we calculated the change for the 2000-2014 period from ASTER ~~DEM~~ DEMs (Figure 12). ~~Our~~ Our estimated mass balance in this area ( $-0.28 \pm 0.15$  m w.e. a<sup>-1</sup>) is very similar to the other studies (Table 8). It is also similar to that of 1976-2000, suggesting that the more strongly negative average for the longer 2000 to 2020 period ( $-0.37 \pm 0.12$  m w.e. a<sup>-1</sup>) is the result of particularly strong negative mass balance after 2014, although cloud-free ASTER data

带格式的: 无, 行距: 2 倍行距, 与下段不同页, 段中分页

are insufficient for direct calculation of the mass balance from 2014-2000. This interpretation is supported by Ren et al. (2020) who also calculated ~~a~~ [higher](#) 2013-2020 [thinning](#) rate ( $-0.43 \pm 0.06$  m w.e.  $\text{a}^{-1}$ ), twice as negative as in 2000-2013. Though the difference in rate is within the combined uncertainties for these periods, this apparent acceleration in thinning in WNT (from  $-0.26 \pm 0.06$  m w.e.  $\text{a}^{-1}$  in 1976-2000 to  $-0.37 \pm 0.15$  m w.e.  $\text{a}^{-1}$  in 2000-2020), is similar to the broader regional [pattern](#) of accelerating loss across the Himalayas and Kangri Karpo Mountains (Maurer et al., 2019; Wu et al., 2018, 2019).

#### 4.2 The influences of debris ~~cover~~ and proglacial lakes on glacier mass changes

Debris can inhibit or ~~promote~~ [enhance](#) glacial ablation depending on its thickness (Maurer et al., 2016). A shallow layer of debris usually enhance melt rates due to its low surface albedo, while thicker layers could suppress melt rates through ~~the process of~~ thermal insulation (Reid et al., 2012). Our results (Table 4) suggest that the debris-covered glaciers in our study ~~area~~ thinned more slowly than the regular, debris-free glaciers in the 1976-2000 period, though the difference is not statistically significant and the small sample size (5) of the debris-covered glaciers compared to regular glaciers (>600) limits our ability to compare these classes. In the 2000-2020 period, the thinning rate of the debris-covered glaciers increased significantly, to double its previous rate, though it remains indistinguishable from the thinning rate for regular glaciers at that time. ~~While S~~ several previous studies indicated that on the glacier-scale, debris-covered glaciers thin more slowly than debris-free glaciers (Nicholson & Benn, 2006; Scherler et al., 2011; Vincent et al., 2016). ~~However,~~ large-scale geodetic studies reported no significant differences in the thinning rates between debris-covered and clean glaciers on time scales more than a decade after 2000 (Brun et al., 2019; Ke et al., 2020; Maurer et al., 2019), a finding that

is supported by this study.

Banerjee (2017) ~~proposed a theory~~suggested that the thinning rate of a debris-covered glacier is initially slower than that of a similar clean glacier at the early stage of warming but subsequently matches and then overtakes the clean counterpart. In ~~this~~ theory, the time required for their respective melting rates to cross ~~between a debris-covered glacier and debris-free glacier seems to be~~is controlled by the rate of warming, ~~and there is~~with —little difference between ~~their~~ thinning rates ~~of the two glaciers~~ at low rates of warming (Banerjee, 2017). The large difference in the 1976-2000 mean melt rates of the regular versus debris-covered glaciers in our study provides some supports for this theory, but a larger sample with lower uncertainty is needed to verify this.

Glaciers with proglacial lakes can experience relatively high mass loss through calving and thermal undercutting (Maurer et al., 2016; Thompson et al., 2012) and the expansion of such lakes can cause dynamic thinning to propagate up —glacier (Ke et al., 2020). Glaciers terminating in proglacial lakes in our study area had the highest mean ~~rates of~~ thinning rates of all the classes in both time periods, and more negative mass balance compared to both ~~types of~~ land-terminating glaciers (both regular and debris covered glaciers) during 2000-2020.

#### 4.3 Topographic and climatic controls of varying glacier mass loss

If climate is the driving force behind glacier change, topographical parameters ~~are~~ controlling factors which can modulate this change (Pandey et al., 2017). Controls on glacier thickness and areal change are complicated, however, with additional factors including local variations in localized climate, glacier thickness, morphology, the presence of proglacial/supraglacial lakes and debris cover, and latitude and longitude (Brun et al.,

2018,2019; Ke et al.,2020; Maurer et al., 2019).

We found that both glacier areal retreat rate (Figure 5b) and thinning rate (Figures 7 and 9) generally decreased with increasing altitude, agreeing with previous studies (Li & Lin, 2017; Wu et al., 2016; Ye et al., 2017; Zhou et al., 2019). However, the effect of slope and aspect on glacier thickness has been rarely studied. We found that in the slope range of 8-40°, where the glaciers were mainly distributed, the rate of areal retreat increased ~~with the increase of as~~ slope increased (Figure 5c), but ~~the~~ thinning rate decreased ~~with slope~~ (Figure 9b). This may reflect the preferential loss (retreat) of relative thin ice on steeper slopes, even where thinning rates were not exceptional. ~~Overall, T~~the relationship between aspect and both areal retreat and thinning was ~~spatially~~ inconsistent and varied in time (Figures 5d and 9c).

Mean glacier ~~mass~~ thinning and ~~area change~~retreat rates ~~e-estimates showed were~~ consistently higher ~~mean rates of thinning and retreat~~ in the Nam Co basin than Lhasa River basin (Table 2 and 3), in agreement with Bolch et al.(2010) and Li & Lin (2017), and the glaciers in central ~~of~~WNT showed particularly strong melting from 2000 to 2020. While the glacier distribution on the TP broadly follows the regional atmospheric circulation pattern (Yao et al., 2012), the variability in glacier loss within regions cannot always be fully explained by the changes in precipitation and temperature on this scale (Wu et al., 2018).

~~The increasingly-negative mass balance through time is consistent with T~~the temperature record from ~~the~~ three weather stations ~~that~~ shows a consistent warming trend (~~averaging with a mean rate of~~ 0.0485 °C a<sup>-1</sup>-) and gridded temperature data showing a more rapid increase during 2000-2018 than 1979-2000 (Figure 14), alongside precipitation that increased during

1979-2000 (Figure 13) but decreased during 2000-2018 and the precipitation record a slight wetting trend between 1976 and 2020 (Figure.13). The the significant accelerated –warming from 2014 to 2018 (red area in Figure 13 (2014-2018)) corresponds geographically to the substantial central–WNT glacier thinning highlighted in the dashed in Figure- 7. Precipitation also increased substantially in this region from 2014 to 2018, and glacier melting can be particularly intense under combined warm and wet conditions (Li et al., 2020; Oerlemans & Fortuin, 1992).

While the overall, the trends of temperature and precipitation in the ablation season (June to September) and accumulation season (October to December and January to May) were similar to annual changes, the temperature and precipitation data from 2014 to 2018 described above offer a compelling explanation for the main temporal and spatial variations in glacier change in the WNT, particularly the high rates of thinning from 2014-2018. They do not directly explain why the Nam Co glaciers thinned more rapidly than elsewhere, however. The trends of temperature and precipitation in ablation season (June to September) and accumulation season (October to December and January to May) are similar to annual changes. The gridded data show that the temperature in the study area increased more during 2000-2018 than during 1979-2000 (Figure.14) and that Precipitation increased during 1979-2000 but decreased during 2000-2018. This corresponds to the temporal pattern of glacier change (glacier loss during 2000-2020 was greater than that during 1976-2000), and the significant warming from 2014 to 2018 (red area in Figure 13 (2014-2018)) corresponds geographically to the substantial central–WNT thinning highlighted in the dashed in Figure- 7. Precipitation also increased substantially in the region from 2014 to 2018., and glacier melting can be

particularly intense under combined warm and wet conditions (Li et al., 2020; Oerlemans & Fortuin, 1992).

The temperature and precipitation data from 2014 to 2018 described above offer a compelling explanation for the main temporal and spatial variations in glacier change in the WNT, particularly the high rates of thinning from 2014–2018, though they do not directly explain why the Nam Co glaciers thinned more rapidly than elsewhere.

The glacier-area-weighted mean glacier elevation on the side of the Nam Co drainage basin is slightly lower than that of Lhasa River basin (Figure 2), which may help explain this, though even in some comparable elevation bins, elevation changes in the Nam Co rates were more negative than in equivalent Lhasa-basin elevations rates (Figure 8). Other possible explanations include differences in the impact of black carbon and dust in reducing the surface albedo (Lau et al., 2010; Ming et al., 2008), and Qu et al. (2014) did observe a decrease in albedo at Zhadang glacier (Nam Co drainage basin) from 2001–2012.

## 5. Conclusions

Based on KH-9, Landsat, SRTM and ASTER satellite data, we have quantified the changes of glacier area, surface elevation and mass balance in the WNT over the past 44 years. Our major conclusions are:

(1) Glaciers in the WNT retreated by  $295.73 \pm 43.45 \text{ km}^2$ , or  $33.42 \pm 4.9\%$  of their area, from 1976–2020, at a mean retreat rate of  $-0.76 \pm 0.11 \text{ \% a}^{-1}$ . Over this time, they lost a total of  $11.56 \pm 0.10 \text{ Gt}$  of ice.

(2) The average retreat rate from 2000 to 2020 ( $-1.17 \pm 0.30 \text{ \% a}^{-1}$ ) was more than twice that from 1976 to 2000 ( $-0.54 \pm 0.21 \text{ \% a}^{-1}$ ). Similarly, the mean glacier mass balance from

---

2000 to 2020 ( $-0.37 \pm 0.12$  m w.e.a<sup>-1</sup>) was more negative than that from 1976 to 2000 ( $-0.26 \pm 0.09$  m w.e.a<sup>-1</sup>) (though the change is within the uncertainties). The more ~~negative mass balance~~ rapid ice loss from 2000 to 2020 was mainly due to intensified glacier melting after 2014, which was likely associated with particularly strong warming of the region after 2014~~that year~~.

(3) In the WNT the spatial and temporal patterns of glacier loss can largely be explained by the observed patterns of regional climate change. Locally, the mass balance varied between different types of glaciers with proglacial lakes associated with ~~the~~ most rapid loss, particularly during 2000–2020. The mass balance of debris-covered glaciers was similar to debris-free glaciers during 2000–2020.

(4) Topographic setting influenced retreat and thinning, with loss rates decreasing with increasing elevation. The rate of both glacier retreat and thinning decreased with elevation, but the relationship between the parameters of slope and aspect with thinning rates differed from their relationship with retreat rates, spatially and through time. For slopes of 8–40° (~~which~~ including most glaciers), for example, the retreat rate increased with slope while the thinning rate decreased.

In this study, we observed accelerated glacier loss in the WNT on multi-year time scales. However, factors such as precipitation, temperature and altitude could not yet fully explain the heterogeneity of glacier changes. Thus, more detail data and glacier ablation models are needed to fully understand the mechanism of glacier change in the future.

#### Author contributions:

Conceptualization, S.W. and J.L.; methodology, S.W.; software, S.W. and X.Q.; data curation, S.W., and J.Z.; writing—original draft preparation, S.W.; writing—review and editing,



---

526 H.P. and L.K.; visualization, X.Q. and H.P.; supervision, W.X. and Y.Z.; project administration,  
527 J.L.; funding acquisition, J.L.

528 **Acknowledgements:**

529 This work was supported by the Second Tibetan Plateau Scientific Expedition and  
530 Research Program (STEP; Ministry of Science and Technology, MOST; grant no.  
531 2019QZKK0207), the National Natural Science Foundation of China (NSFC; grant no.  
532 92047301).

533 **References:**

- 534 Bahr, D. B., Meier, M. F., & Peckham, S. D. (1997). The physical basis of glacier volume-area  
535 scaling. *J Geophys Res-Sol Ea.* 102(B9), 20355–20362. <https://doi.org/10.1029/97JB01696>.
- 536 Bahr, D. B., Pfeffer, W. T., & Kaser, G. (2015). A review of volume-area scaling of glaciers.  
537 *Rev Geophys.* 53(1), 95–140. <https://doi.org/10.1002/2014RG000470>.
- 538 Banerjee, A. (2017). Brief communication: thinning of debris-covered and debris-free glaciers  
539 in a warming climate. *Cryosphere.* 11(1), 133-138. <https://doi.org/10.5194/tc-11-133-2017>.
- 540 Bhattacharya, A., Bolch, T., Mukherjee, K., King, O., Menounos, B., & Yao, T., et al. High  
541 Mountain Asian glacier response to climate revealed by multi-temporal satellite observations  
542 since the 1960s. *Nat Commun.* <https://doi.org/10.1038/s41467-021-24180-y>.
- 543 Bolch, T., Yao, T., Kang, S., Buchroithner, M. F., Scherer, D., & Schneider, C., et al. (2010). A  
544 glacier inventory for the western Nyainqentanglha range and the Nam Co Basin, Tibet, and  
545 glacier changes 1976-2009. *Cryosphere.* 4(3), 419-433. <https://doi.org/10.5194/tc-4-419-2010>.
- 546 Brun, F., Berthier, E., Wagnon, P., Kääb, A., & Treichler, D. (2018). A spatially resolved  
547 estimate of High Mountain Asia glacier mass balances-, 2000-2016. *Nat Geosci.* 10(9), 668–

---

548 673. <https://doi.org/10.1038/s41561-018-0171-z>

549 Brun, F., Wagnon, P., Berthier, E., Jomelli, V., Maharjan, S. B., & Kraaijenbrink, P. D. A., et al.

550 (2019). Heterogeneous Influence of Glacier Morphology on the Mass Balance Variability in

551 High Mountain Asia. *J Geophys Res-Sol Ea.* 124(6), 1331–1345.

552 <https://doi.org/10.1029/2018JF004838>.

553 Brun, F., Wagnon, P., Berthier, E., Shea, J. M., & Immerzeel, W. W. (2018). Ice cliff

554 contribution to the tongue-wide ablation of Changri Nup Glacier, Nepal, central Himalaya.

555 *Cryosphere.* 12(11), 3439-3457. <https://doi.org/10.5194/tc-12-3439-2018>.

556 Ding, L., Zhou, J., Wang, W. (2020). Dataset of 0.01° Surface Air Temperature over Tibetan

557 Plateau (1979-2018). National Tibetan Plateau Data Center. 10.11888/Meteoro.tpdc.270339.

558 CSTR: 18406.11.Meteoro.tpdc.270339.

559 Duan, A., & Xiao, Z. (2015). Does the climate warming hiatus exist over the Tibetan Plateau?

560 *Sci Rep-UK.* 5, 13711. <https://doi.org/10.1038/srep13711>.

561 Frauenfelder, R., & Kääb, A. (2009). Glacier mapping from multi-temporal optical remote

562 sensing data within the Brahmaputra River Basin.

563 Gardner, A. S., Moholdt, G., Cogley, J. G., Wouters, B., Arendt, A. A., Wahr, J., et .al. (2013).

564 A reconciled estimate of glacier contributions to sea level rise: 2003 to 2009. *Science,*

565 340(6134), 852-857. <https://doi.org/10.1126/science.1234532>.

566 Guo, W., Liu, S., Xu, J., Wu, L., Shangguan, D., & Yao, X., et al. (2015). The second chinese

567 glacier inventory: data, methods and results. *J Glaciol.* 61(226), 357-372.

568 <https://doi.org/10.3189/2015JoG14J209>.

569 He, J., Yang, K., Tang, W., Lu, H., Qin, J., & Chen, Y., et al. (2020). The first high-resolution

---

570 meteorological forcing dataset for land process studies over China. *Sci Data*. 7.  
571 <https://doi.org/10.1038/s41597-020-0369-y>.

572 Immerzeel, W. W., Lutz, A. F., Andrade, M., Bahl, A., Biemans, H., & Bolch, T., et al. (2020).  
573 Importance and vulnerability of the world's water towers. *Nature*. 577(7790) ,364–  
574 369.<https://doi.org/10.1038/s41586-019-1822-y>.

575 Kääb, A., Berthier, E., Nuth, C., Gardelle, J., & Arnaud, Y. (2012). Contrasting patterns of early  
576 twenty-first-century glacier mass change in the Himalayas. *Nature*. 488(7412), 495-498.  
577 <https://doi.org/10.1038/nature11324>.

578 Ke, L., Song, C., Yong, B., Lei, Y., & Ding, X. (2020). Which heterogeneous glacier melting  
579 patterns can be robustly observed from space? A multi-scale assessment in southeastern Tibetan  
580 Plateau. *Remote Sens Environ*.242. <https://doi.org/10.1016/j.rse.2020.111777>

581 Lau, W., Kim, M. K., Kim, K. M., & Lee, W. S. (2010). Enhanced surface warming and  
582 accelerated snow melt in the Himalayas and Tibetan Plateau induced by absorbing aerosols.  
583 *Environ. Res. Lett*. 5(2), 025204. <https://doi.org/10.1088/1748-9326/5/2/025204>.

584 Li, Y. J., Ding, Y.J., Shangguan, D. H., & Wang, R. J. (2020). Regional differences in global  
585 glacier retreat from 1980 to 2015 - sciencedirect. *Adv. Clim. Chang. Res.*, 10( 4), 203-213.  
586 <https://doi.org/10.1016/j.accre.2020.03.003>.

587 Li, G., & Lin, H. (2017). Recent decadal glacier mass balances over the Western  
588 Nyainqentanglha Mountains and the increase in their melting contribution to Nam Co Lake  
589 measured by differential bistatic SAR interferometry. *Global Planet Change*, 149, 177-190.  
590 <https://doi.org/10.1016/j.gloplacha.2016.12.018>.

591 Lin, L., Gao, M., Liu, J., Wang, J., Wang, S., & Chen, X., et al. (2020). Understanding the

---

592 effects of climate warming on streamflow and active groundwater storage in an alpine  
593 catchment: The upper Lhasa River. *Hydrol Earth Syst Sc.* 24(3), 1145-1157.  
594 <https://doi.org/10.5194/hess-24-1145-2020>.

595 Luo, W., Zhang, G., Chen, W., & Xu, F. (2020). Response of glacial lakes to glacier and climate  
596 changes in the western Nyainqentanglha range. *Sci Total Environ.* 735, 139607.  
597 <https://doi.org/10.1016/j.scitotenv.2020.139607>.

598 Lutz, A. F., Immerzeel, W. W., Shrestha, A. B., & Bierkens, M. F. P. (2014). Consistent increase  
599 in High Asia's runoff due to increasing glacier melt and precipitation. *Nat Clim Change.* 4(7),  
600 587–592. <https://doi.org/10.1038/nclimate2237>.

601 Maurer, J. M., Schaefer, J. M., Rupper, S., & Corley, A. (2019). Acceleration of ice loss across  
602 the Himalayas over the past 40 years. *Sci Adv.* 5(6), aav7266.  
603 <https://doi.org/10.1126/sciadv.aav7266>.

604 Maurer, J., & Rupper, S. (2015). Tapping into the Hexagon spy imagery database: A new  
605 automated pipeline for geomorphic change detection. *ISPRS J Photogramm.* 108, 113-127.  
606 <https://doi.org/10.1016/j.isprsjprs.2015.06.008>.

607 Maurer, J. M., Rupper, S. B., & Schaefer, J. M. (2016). Quantifying ice loss in the eastern  
608 himalayas since 1974 using declassified spy satellite imagery. *Cryosphere.* 10(5), 2203-2215.  
609 <https://doi.org/10.5194/tc-10-2203-2016>.

610 Ming, J., Cachier, H., Xiao, C., Qin, D., Kang, S., & Hou, S., et al. (2008). Black carbon record  
611 based on a shallow Himalayan ice core and its climatic implications. *Atmos Chem Phys*, 8(5),  
612 1343–1352. <https://doi.org/10.5194/acp-8-1343-2008>.

613 Neckel, N., Kropá, J., Bolch, T., & Hochschild, V. (2014). Glacier mass changes on the Tibetan

---

614 Plateau 2003 – 2009 derived from ICESat laser altimetry measurements. *Environ Res Lett*, 9(1),  
615 468-475. <https://doi.org/10.1088/1748-9326/9/1/014009>.

616 Nuth, C., & Kääb, A. (2011). Co-registration and bias corrections of satellite elevation data sets  
617 for quantifying glacier thickness change. *Cryosphere*, 5(1), 271-290.  
618 <https://doi.org/10.5194/tc-5-271-2011>.

619 Oerlemans, J., & Fortuin, J. (1992). Sensitivity of Glaciers and Small Ice Caps to Greenhouse  
620 Warming. *Science*. 258(5079), 115-117. <https://doi.org/10.1126/science.258.5079.115>.

621 Pandey, P., Ali, S. N., Ramanathan, A. L., Champati ray, P. K., & Venkataraman, G. (2017).  
622 Regional representation of glaciers in Chandra Basin region, western Himalaya, India. *Geosci*  
623 *Front*. 8(4), 841–850. <https://doi.org/10.1016/j.gsf.2016.06.006>.

624 Pritchard, H. D. (2019). Asia's shrinking glaciers protect large populations from drought stress.  
625 *Nature*.569(7758), 649-654. <https://doi.org/10.1038/s41586-019-1240-1>.

626 Qiao, X., Liu, J., Wang, S., Wang, J., Ji, H., Chen, X., et al. (2021). Lead-lag correlations  
627 between snow cover and meteorological factors at multi-time scales in the Tibetan Plateau  
628 under climate warming. *Theor. Appl. Climatol*, 146(3), 1459-1477.  
629 <https://doi.org/10.1007/s00704-021-03802-x>

630 Qu, B., Ming, J., Kang, S. C., Zhang, G. S., Li, Y. W., & Li, C. D. et al. (2014). The decreasing  
631 albedo of the Zhadang glacier on western Nyainqentanglha and the role of light-absorbing  
632 impurities. *Atmos Chem Phys*.14(20), 11117-11128. [https://doi.org/10.5194/acp-14-11117-](https://doi.org/10.5194/acp-14-11117-2014)  
633 2014.

634 Reid, T. D., Carenzo, M., Pellicciotti, F., & Brock, B. W. (2012). Including debris cover effects  
635 in a distributed model of glacier ablation. *J Geophys Res-Atmos*. 117(D18).

---

636 <https://doi.org/10.1029/2012JD017795>.

637 Ren, S., Menenti, M., Jia, L., Zhang, J., & Li, X. (2020). Glacier Mass Balance in the  
638 Nyainqentanglha Mountains between 2000 and 2017 Retrieved from ZiYuan-3 Stereo Images  
639 and the SRTM DEM. *Remote Sens.* 12(5), 864-. <https://doi.org/10.3390/rs12050864>.

640 RGI Consortium. (2017). Randolph Glacier Inventory – A Dataset of Global Glacier Outlines:  
641 Version 6.0. July, 1–27. <https://ci.nii.ac.jp/naid/40021243259/>

642 Scherler, D., Bookhagen, B., & Strecker, M. R. (2011). Spatially variable response of  
643 himalayan glaciers to climate change affected by debris cover. *Nat Geosci*, 4(3), 156-159.  
644 <https://doi.org/10.1038/ngeo1068>.

645 Shangguan, D. H., Liu, S. Y., Ding, L. F., Zhang, S. Q., Gang, L. I., & Zhang, Y., et al. (2008).  
646 Variation of Glaciers in the Western Nyainqentanglha Range of Tibetan Plateau during 1970 –  
647 2000. *Journal of Glaciology and Geocryology*. (In Chinese)

648 Su, F., Zhang, L., Ou, T., Chen, D., Yao, T., & Tong, K., et al. (2016). Hydrological response to  
649 future climate changes for the major upstream river basins in the Tibetan Plateau. *Global Planet*  
650 *Change*. 136, 82-95. <https://doi.org/10.1016/j.gloplacha.2015.10.012>.

651 Surazakov, A., & Aizen, V. (2010). Positional accuracy evaluation of declassified hexagon KH-  
652 9 mapping camera imagery. *Photogramm Eng Rem S.* 76(5), 603-608.  
653 <https://doi.org/10.14358/PERS.76.5.603>.

654 Thompson, S. S., Benn, D. I., Dennis, K., & Luckman, A. (2012). A rapidly growing moraine-  
655 dammed glacial lake on Ngozumpa Glacier, Nepal. *Geomorphology*. 145–146, 1–11.  
656 <https://doi.org/10.1016/j.geomorph.2011.08.015>.

657 Vincent, C., Wagnon, P., Shea, J. M., Immerzeel, W. W., Kraaijenbrink, P., & Shrestha, D., et

---

658 al. (2016). Reduced melt on debris-covered glaciers: Investigations from Changri Nup Glacier,  
659 Nepal. *Cryosphere*, 10(4), 1845-1858. <https://doi.org/10.5194/tc-10-1845-2016>.

660 Viviroli, D., Dürre, H. H., Messerli, B., Meybeck, M., & Weingartner, R. (2007). Mountains of  
661 the world, - water towers for humanity: Typology, mapping, and global significance. *Water*  
662 *Resour Res.* 43(7). <https://doi.org/10.1029/2006WR005653>.

663 Wang, J. R., Chen, X., Liu, J. T., & Qi, H. (2021). Changes of Precipitation–Runoff  
664 Relationship Induced by Climate Variation in a Large Glaciated Basin of the Tibetan Plateau.  
665 *J. Geophys. Res.-Atmos.* 126(21),<https://doi.org/10.1029/2020JD034367>.

666 Wang, Q., Yi, S., & Sun, W. (2021). Continuous Estimates of Glacier Mass Balance in High  
667 Mountain Asia Based on ICESat-1,2 and GRACE/GRACE Follow-On Data. *Geophys Res Lett.*  
668 48(2). <https://doi.org/10.1029/2020GL090954>.

669 Wang, X., Zhou, A. G., Siegert, F., Zhang, Z., & Chen, K. L. (2012). Glacier temporal-spatial  
670 change characteristics in western Nyainqentanglha Range, Tibetan Plateau 1977-2010. *Earth*  
671 *Science - Journal of China University of Geosciences* 37(5): 1082-1092. (In Chinese)

672 Wu, G., Duan, A., Liu, Y., Mao, J., Ren, R., & Bao, Q., et al. (2015). Tibetan Plateau climate  
673 dynamics: Recent research progress and outlook. *Natl Sci Rev.* 2(1), 100–116.  
674 <https://doi.org/10.1093/nsr/nwu045>.

675 Wu, K. P., Liu, S., Jiang, Z., Xu, J. L., & Wei, J. (2019). Glacier mass balance over the central  
676 Nyainqentanglha Range during recent decades derived from remote-sensing data. *J*  
677 *Glaciol.* 65(251), 422–439. <https://doi.org/10.1017/jog.2019.20>.

678 Wu, K. P., Liu, S., Jiang, Z., Xu, J., Wei, J., & Guo, W. (2018). Recent glacier mass balance  
679 and area changes in the kangri karmo mountains from deqs and glacier inventories. *The*

---

680 Cryosphere. 12(1), 103-121. <https://doi.org/10.5194/tc-12-103-2018>.

681 Wu, K. Q., Liu, S. Y., Guo, W. Q., Wei, J. F., Xu, J. L., & Bao, W. J., et al. (2016). Glacier  
682 change in the western Nyainqentanglha Range, Tibetan Plateau using historical maps and  
683 Landsat imagery: 1970-2014. *J MT Sci Engl.* 13(8), 1358–1374.  
684 <https://doi.org/10.1007/s11629-016-3997-0>.

685 Wu, Y., & Zhu, L. (2008). The response of lake-glacier variations to climate change in Nam Co  
686 Catchment, central Tibetan Plateau, during 1970–2000. *J Geogr Sci*, 18(2), 177-189.  
687 <https://doi.org/10.1007/s11442-008-0177-3>.

688 Yang, K., He, J., Tang, W., Qin, J., & Cheng, C. (2010). On downward shortwave and longwave  
689 radiations over high altitude regions: Observation and modeling in the Tibetan Plateau. *Agr*  
690 *Forest Meteorol.*150(1), 38-46. <https://doi.org/10.1016/j.agrformet.2009.08.004>.

691 Yao, T. D., Li, Z. G., Yang, W., Guo, X. J., Zhu, L. P., & Kang, S. C., et al. (2010). Glacial  
692 distribution and mass balance in the Yarlung Zangbo river and its influence on lakes. *Chinese*  
693 *Sci Bull*, 55(20), 2072–2078. <https://doi.org/10.1007/s11434-010-3213-5>.

694 Yao, T. D., Pu, J., Lu, A., Wang, Y., & Yu, W. (2007). Recent glacial retreat and its impact on  
695 hydrological processes on the tibetan Plateau, China, and surrounding regions. *Arct Antarct*  
696 *Alp Res.*39(4), 642-650. [https://doi.org/10.1657/1523-0430\(07-510\)\[YAO\]2.0.CO;2](https://doi.org/10.1657/1523-0430(07-510)[YAO]2.0.CO;2).

697 Yao, T. D., Thompson, L., Yang, W., Yu, W., Gao, Y., & Joswiak, D. (2012). Different glacier  
698 status with atmospheric circulations in tibetan plateau and surroundings. *Nat Clim Change*.  
699 2(9), 663–667. <https://doi.org/10.1038/NCLIMATE1580>.

700 Ye, Q., Zong, J., Tian, L., Cogley, J. G., Song, C., & Guo, W. (2017). Glacier changes on the  
701 Tibetan Plateau derived from Landsat imagery: Mid-1970s - 2000-13. *J Glaciol*, 63(238), 273–



---

287. <https://doi.org/10.1017/jog.2016.137>.

Yu, W., Yao, T., Kang, S., Pu, J., Yang, W., & Gao, T., et al. (2013). Different region climate regimes and topography affect the changes in area and mass balance of glaciers on the north and south slopes of the same glacierized massif (the West Nyainqentanglha Range, Tibetan Plateau). *J Hydrol*, 495, 64-73. <https://doi.org/10.1016/j.jhydrol.2013.04.034>.

Zhang, G., Yao, T., Shum, C. K., Yi, S., Yang, K., & Yu, J., et al. (2017). Lake volume and groundwater storage variations in tibetan plateau's endorheic basin. *Geophys Res Lett*, 44(11), 5550-5560. 44(11), 5550–5560. <https://doi.org/10.1002/2017GL073773>.

Zhang, Q., & Zhang, G. (2017). Glacier elevation changes in the western nyainqentanglha range of the Tibetan Plateau as observed by TerraSAR-X/TanDEM-X images. *Remote Sens Lett*, 8(12), 1143-1152. <https://doi.org/10.1080/2150704X.2017.1362123>.

Zhang, S.Q., Gao, X., Ye, B.S., Zhang, X.W., Stefan, H. (2011). A modified monthly degree-day model for evaluating glacier runoff changes in China. part II: application. *Hydrol Process*. 26(11), 1697-1706, <https://doi.org/10.1002/hyp.8291>.

Zhao, Q., Ding, Y., Wang, J., Gao, H., Zhang, S., & Zhao, C., et al. (2019). Projecting climate change impacts on hydrological processes on the Tibetan Plateau with model calibration against the glacier inventory data and observed streamflow. *J Hydrol*, 573, 60-81. <https://doi.org/10.1016/j.jhydrol.2019.03.043>.

Zhou, S., Kang, S., Feng, C., & Joswiak, D. R. (2013). Water balance observations reveal significant subsurface water seepage from Lake Nam Co, south-central Tibetan Plateau. *J Hydrol*, 491(1), 89-99. <https://doi.org/10.1016/j.jhydrol.2013.03.030>.

Zhou, Y., Hu, J., Li, Z., Li, J., Zhao, R., & Ding, X. (2019). Quantifying glacier mass change

---

724 and its contribution to lake growths in central Kunlun during 2000–2015 from multi-source  
725 remote sensing data. *J Hydrol.* 570, 38–50, <https://doi.org/10.1016/j.jhydrol.2019.01.007>.  
726 Zhou, Y., Li, Z., Li, J., Zhao, R., & Ding, X. (2018). Glacier mass balance in the Qinghai–Tibet  
727 Plateau and its surroundings from the mid-1970s to 2000 based on Hexagon KH-9 and SRTM  
728 DEMs. *Remote Sens Environ.* 210, 96–112. <https://doi.org/10.1016/j.rse.2018.03.020>.

Table 1. Datasets used to delineate glacier outline for the WNT (1976-2020)

| Data       | Satellite and sensor | Path/Row | Spatial Resolution (m) | Suitability of scene                  | Utilizations                                                                            |
|------------|----------------------|----------|------------------------|---------------------------------------|-----------------------------------------------------------------------------------------|
| 1976/01/07 | Hexagon KH-9         |          | 8                      | Seasonal snow in the northeast        | Glacier inventory in 1976 for whole study area                                          |
| 1976/12/17 | Landsat MSS          | 148/39   | 30                     | Little seasonal snow in the northeast | Glacier inventory in 1976 for whole study area except for a small part of the southeast |
| 1977/03/17 | Landsat MSS          | 149/39   | 30                     | Some clouds                           | Additional information for glacier of 1976                                              |
| 2000/11/01 | Landsat ETM+         | 138/39   | 30                     | Seasonal snow in the northeast        | Glacier inventory in 2000 for whole study area                                          |
| 2000/11/17 | Landsat ETM+         | 138/39   | 30                     | Seasonal snow in the northeast        | Glacier inventory in 2000 for whole study area                                          |
| 2001/02/05 | Landsat ETM+         | 138/39   | 30                     |                                       | Additional information for glacier of 2000                                              |
| 2014/08/12 | Landsat OLI          | 38/39    | 30                     | Little clouds                         | Glacier inventory in 2014 for whole study area                                          |
| 2014/10/15 | Landsat ETM+         | 138/39   | 30                     | Some stripes                          | Additional information for glacier of 2014                                              |
| 2014/06/17 | Landsat ETM+         | 138/39   | 30                     | Some stripes                          | Additional information for glacier of 2014                                              |
| 2016/08/05 | Sentinel-1           |          |                        |                                       | Check debris glacier                                                                    |
| 2016/08/29 | Sentinel-1           |          |                        |                                       | Check debris glacier                                                                    |
| 2020/09/29 | Landsat OLI          | 138/39   | 30                     | Little clouds                         | Glacier inventory in 2000 for whole study area                                          |
| 2020/10/15 | Landsat OLI          | 138/39   | 30                     |                                       | Glacier inventory in 2000 for whole study area                                          |

731

Table 2 Glacier area changes over the WNT from 1976 to 2020

|                   | 1976<br>Area(km2) | 2000<br>Area (km <sup>2</sup> ) | 2020<br>Area (km <sup>2</sup> ) | 1976-2000<br>△Area (% a <sup>-1</sup> ) | 2000-2020<br>△Area (% a <sup>-1</sup> ) | 1976-2020<br>△Area (% a <sup>-1</sup> ) |
|-------------------|-------------------|---------------------------------|---------------------------------|-----------------------------------------|-----------------------------------------|-----------------------------------------|
| The WNT           | 884.90± 29.71     | 770.03±33.44                    | 589.17±31.72                    | -0.54± 0.21                             | -1.17± 0.30                             | -0.76± 0.11                             |
| Lhasa River basin | 662.23±21.95      | 580.81±22.79                    | 447.93±21.74                    | -0.51± 0.20                             | -1.14± 0.27                             | -0.74± 11                               |
| Nam Co basin      | 222.58±7.76       | 189.22±7.62                     | 141.22±7.10                     | -0.62± 0.20                             | -1.27± 0.32                             | -0.83± 0.11                             |

732

Table 3 Glacier elevation change, mass balance and total mass change over the WNT from 1976 to 2020

|                   | 1976-2000                                |                                          |                                            | 2000-2020                                |                                          |                                            |
|-------------------|------------------------------------------|------------------------------------------|--------------------------------------------|------------------------------------------|------------------------------------------|--------------------------------------------|
|                   | Elevation change<br>(m a <sup>-1</sup> ) | Mass Balance<br>(m w.e.a <sup>-1</sup> ) | Total mass<br>change (Gt a <sup>-1</sup> ) | Elevation change<br>(m a <sup>-1</sup> ) | Mass Balance<br>(m w.e.a <sup>-1</sup> ) | Total mass<br>change (Gt a <sup>-1</sup> ) |
| The WNT           | -0.31 ± 0.10                             | -0.26± 0.09                              | -0.24± 0.08                                | -0.44± 0.13                              | -0.37± 0.12                              | -0.29± 0.09                                |
| Lhasa River basin | -0.29± 0.12                              | -0.25± 0.10                              | -0.21± 0.10                                | -0.40± 0.16                              | -0.34± 0.14                              | -0.26± 0.09                                |
| Nam Co basin      | -0.36 ± 0.17                             | -0.31 ± 0.15                             | -0.06± 0.02                                | -0.52± 0.18                              | -0.44± 0.16                              | -0.06 ± 0.03                               |

733

Table 4 Statistics of area, quantity, and mass balance of different types of glaciers

| Glacier type                      | 1976-2000                  |        |                                          | 2000-2020                  |        |                                          |
|-----------------------------------|----------------------------|--------|------------------------------------------|----------------------------|--------|------------------------------------------|
|                                   | Area<br>(km <sup>2</sup> ) | Number | Mass Balance<br>(m w.e.a <sup>-1</sup> ) | Area<br>(km <sup>2</sup> ) | Number | Mass Balance<br>(m w.e.a <sup>-1</sup> ) |
| Lake terminating                  | 70.29±2.69                 | 46     | -0.36±0.26                               | 49.6±1.82                  | 34     | -0.56 ±0.31                              |
| Debris cover                      | 55.42±1.25                 | 5      | -0.20±0.34                               | 51.59±1.77                 | 5      | -0.44 ±0.47                              |
| Debris cover and lake terminating | 5.46±0.32                  | 1      | -0.18±0.80                               | 6.05±0.32                  | 1      | -0.34±0.92                               |
| Regular                           | 615.29±20.73               | 617    | -0.30±0.10                               | 554.64±22.93               | 692    | -0.42±0.12                               |

734

735

Table 5 The comparison of previous studies and this study on glacier change over the WNT

| Time period            | Region                         | Area change<br>(%)          | Data                                               | Method                             | Study                         |
|------------------------|--------------------------------|-----------------------------|----------------------------------------------------|------------------------------------|-------------------------------|
| 1970-2000              | Nam Co Basin                   | -15.4                       | Aero-photo topographic map, Landsat ETM+           | Manual                             | Wu & Zhu (2008)               |
| 1976-2001              | Nam Co Basin                   | -6.8±3.1                    | Hexagon KH-9, Corona, Landsat<br>MSS/TM/ETM+       | Band ratio and revised<br>manually | Bolch et al.(2010b)           |
| 1970/80-2000           | Southwest of WNT near<br>Lhasa | -19.8                       | LandSat Series, ASTER,                             | Band ratio                         | Franenfelder & Kääb<br>(2009) |
| 1977-2000<br>2000-2010 | Southwest of the WNT           | -15.6±3.27<br>-8.11±3.09    | Hexagon KH-9, Landsat MSS/TM/ETM+                  | Band ratio and revised<br>manually | Wang et al.(2012)             |
| 1970-2000              | The WNT                        | -5.7                        | Aero-photo topographic map, Landsat<br>ETM+, ASTER | Manual                             | Shangguan et al. (2008)       |
| 1970-2000<br>2000-2014 | The WNT                        | -11.7 ±3.6<br>-17.8 ± 4.9   | Chinese Topographic Maps, Landsat<br>TM/ETM+       | Band ratio and revised<br>manually | Wu et al. (2016)              |
| 1976-2000<br>2000-2014 | The WNT                        | -12.98± 4.91<br>-15.78±5.91 | Hexagon KH-9, Landsat<br>MSS/ETM+/OLI              | Band ratio and revised<br>manually | This study                    |

736

Table 6 Comparison of glacier area between this study and study of Wu et al. (2016) in specific years

|                  | Glacier Area (km <sup>2</sup> ) |              |              |              |              |
|------------------|---------------------------------|--------------|--------------|--------------|--------------|
|                  | 1970                            | 1976         | 2000         | 2014         | 2020         |
| Wu et al. (2016) | 892.61±17.76                    | -            | 788.47±25.59 | 648.23±23.54 | -            |
| This study       | -                               | 884.90±29.71 | 770.03±33.44 | 648.55±30.88 | 589.17±31.72 |

737

738

Table 7 Changes in area (A) and mass balance ( $B_N$ ) of Zhadang Glacier and Gurenhekou Glacier in this study, and their mass balance

739

derived from in-situ observations.

| Name       | 1976                | 2000      | 2020      | 1976-2000                          |                                   | 2000-2020                          |                                   | in-situ $B_N$             |
|------------|---------------------|-----------|-----------|------------------------------------|-----------------------------------|------------------------------------|-----------------------------------|---------------------------|
|            | A(km <sup>2</sup> ) |           |           | $\Delta A$<br>(% a <sup>-1</sup> ) | $B_N$<br>(m w.e.a <sup>-1</sup> ) | $\Delta A$<br>(% a <sup>-1</sup> ) | $B_N$<br>(m w.e.a <sup>-1</sup> ) | (m w.e. a <sup>-1</sup> ) |
| Zhadang    | 3.74±0.11           | 3.21±0.11 | 2.33±0.11 | -0.59±0.18                         | -0.25±0.99                        | -1.37±0.25                         | -0.55±1.18                        | -0.59                     |
| Gurenhekou | 1.75±0.07           | 1.59±0.08 | 1.17±0.07 | -0.38±0.24                         | -0.27±1.39                        | -1.32±0.32                         | -0.42±1.29                        | -0.31                     |

740

Table 8 Mass balance estimates (from geodetic and altimetry studies) over the WNT and comparable subregions/catchments.

| Time period | Mass balance (m w.e.a <sup>-1</sup> ) | Data                                             | Study                |
|-------------|---------------------------------------|--------------------------------------------------|----------------------|
| 1976-2000   | -0.25±0.15                            | KH-9 and SRTM                                    | Zhou et al. (2018)   |
| 2003-2009   | -0.20±0.29                            | ICESat                                           | Neckel et al. (2014) |
| 2000-2013   | -0.22±0.23                            |                                                  |                      |
| 2013-2017   | -0.43±0.06                            | SRTM and ZiYuan-3 Three-Line-Array stereo images | Ren et al. (2020)    |
| 2000-2017   | -0.30±0.19                            |                                                  |                      |
| 2000-2014   | -0.24±0.13                            | SRTM and TerraSAR-X/TanDEM-X images              | Li & Lin (2017)      |
| 2000-2014   | -0.26± 0.06                           | SRTM and TerraSAR-X/TanDEM-X images              | Zhang & Zhang (2017) |
| 1976-2000   | -0.26±0.09                            | KH-9 and SRTM                                    |                      |
| 2000-2014   | -0.28±0.15                            | ASTER DEMs                                       | This study           |
| 2000-2020   | -0.37±0.15                            | ASTER DEMs                                       |                      |

741

---

## Figure captions

Figure 1 | Overview of study area and glacier distribution. Label I in the large, red rectangle represents the SW section of the WNT, and Label II in the small, dark red rectangle represents the NE section.

Figure 2 | (a) Coverage of KH-9 image and the number of valid ASTER DEMS after cloud and outlier removal in the buffered area shown. Label I represents the SW section and label II represents the NE section of the WNT (inset, same map scale). (b) and (c) show the total area of glaciers and glacier area covered by the datasets respectively during 1976-2000 and 2000-2020.

~~Figure 2 (a) Coverage of KH image and the number of valid ASTER DEMS grids after cloud and outlier removal in the buffered area shown. (b) and (c) The total area of glaciers and glacier area covered by the datasets respectively during 1976-2000 and 2000-2020.~~

Figure 3 | After alignment-correction and elevation-related deviation correction, elevation change of stable terrain varies with elevation, slope, and aspect during 1976-2000 and 2000-2020.

Figure 4 | Glacier distribution in the WNT in 1976, 2000, 2009, 2014 and 2020. (a) Number and area of glaciers by size category. (b) Distribution of glacier area with altitude. (c) Distribution of glacier area with slope. (d) Distribution of glacier area with aspect. Data in 2009 came from RGI6.0.

~~Figure 4 Glacier distribution in different size categories, with altitude, slope and aspect in the WNT in the year 1976, 2000, 2009, 2014 and 2020.~~

Figure 5 | The distribution of glacier-area change in the WNT from (a) 1976 to 2000-(a), and

764 (b) from 2000 to 2020 (b).

765 Figure 6 | Glacier area changes with (a) time, (b) elevation, (c) slope and (d) aspect.

766 The short lines on either side of the point indicate the margin of error in figure (a, b, c).Figure

767 6 Glacier area changes with time (a), elevation (b), slope (c) and aspect (d)

768 Figure 7 | Mean annual glacier surface elevation changes in the WNT from (a) 1976 to 2000,

769 and (b) 2000 to 2020. Label I represents the SW section and label II represents the NE section

770 of the WNT (on the same scale). The red rectangular box shows an area of the centra WNT

771 referred to in the paper.

772 Figure 7 Mean annual glacier surface elevation changes in the WNT from 1976 to 2000 (a),

773 from 2000 to 2020.

774 Figure 8 | Glacier elevation change with altitude (m a.s.l) in the whole WNT, inside Nam Co

775 drainage basin and outside Nam Co drainage basin from (a) 1976 to 2000 and (b) 2000 to 2020.

776 The dots represent the mean elevation change in each 50-m elevation bin and shaded regions

777 in the altitudinal distributions indicate the uncertainty.Figure 8 Glacier elevation changes in

778 relation to elevation (m a.s.l) in the whole WNT, inside Nam Co drainage basin and outside

779 Nam Co drainage basin from 1976 to 2000 (a), from 2000 to 2020 (b).

780 Figure 9 | The distribution of glacier-wide mass balance for individual glaciers ( $> 2 \text{ km}^2$ ) in the

781 WNT from 1976 to 2000 (a) 1976 to 2000, from 2000 to 2020 and (b) 2000 to 2020.

782 Figure 10 | Glacier elevation change from 1976 to 2000 and from 2000 to 2020 with (a)

783 elevation, (b) slope, and (c) aspect. The dots in figure (a) represent the mean elevation change

784 in each 50-m bin and shaded region in (a) indicate the uncertainty in the altitudinal distributions.

785 (b) is boxplot of dh in  $2^\circ$  slope bins and four lines from bottom to top for one box represent

设置了格式: 字体: (中文) + 中文正文 (等线), 字体颜色: 自动设置, 检查拼写和语法

设置了格式: 上标



minimum value, 25th percentile, 75th percentile, and maximum value, respectively and dots in figure (c) represent the mean elevation change in each 2-° slope bin. (c) represent the mean elevation change in each 45-° aspect bin.

Figure 10 Glacier elevation changes from 1976 to 2000 and from 2000 to 2020 in relation to elevation (a), slope (b) and aspect (c).

Figure 11 | Rate of glacier elevation change with elevation of different glaciers types during (a) 1976-2000 and (b) 2000-2020. Plots represent the mediums of glacier elevation change in each 50-m elevation bin and shaded regions indicate the uncertainty in the altitudinal distributions.

Figure 11 Rate of glacier elevation change with elevation of different type glaciers during 1976-2000 (a), during 2000-2020 (b).

Figure 12 | (a) Glacier elevation change in the WNT during 2000-2014. (b) Glacier elevation changes with altitude in the WNT, inside Nam Co drainage basin and outside Nam Co drainage basin from 2000 to 2014. The dots represent the mean elevation change in each 50-m elevation bin and shaded regions indicate the uncertainty in the altitudinal distributions. (c) Total area of glaciers and that area covered by the datasets during 1976-2000 and 2000-2014

Figure 12 (a) Glacier elevation change in the WNT during 2000-2014. (b) Glacier elevation changes in relation to elevation in the WNT, inside Nam Co drainage basin and outside Nam Co drainage basin from 2000 to 2014. (c) Total area of glaciers and that area covered by the datasets during 1976-2000 and 2000-2014.

Figure 13 | Temperature and precipitation changes for the study area at Damxung, Lhasa and Bange stations from 1976 to 2020. Annual average temperature and precipitation (a, b), ablation season (June to September) average temperature and precipitation (c, d), accumulation

808 [season \(January to May and October to December\) average temperature and precipitation \(e.](#)  
809 [f\).](#)

810 [Figure 13 Temperature and precipitation changes for the study area at Damxung, Lhasa and](#)  
811 [Bange stations from 1976 to 2020.](#)

812 Figure 14 [Gridded temperature and precipitation change during specific time periods from](#)  
813 [China Meteorological Forcing Data.](#)

814  
815 Figure 1 Overview of study area and glacier distribution. Label [I](#) in the [large](#), red rectangle  
816 represents the SW section [of the WNT](#), and Label II in the [small](#), dark [red](#) rectangle represents  
817 the NE section [of the WNT](#).

818  
819 Figure 2 [\(a\)](#) Coverage of KH-9 image and the number of valid ASTER DEMS [grids](#) after  
820 cloud and outlier removal in the buffered area shown. Label I represents the SW section and  
821 label II represents the NE section of the WNT (inset, same map scale). (b) and (c) showed the  
822 total area of glaciers and glacier area covered by the datasets respectively during 1976-2000  
823 and 2000-2020.

824  
825

826 [Figure 3 | After alignment-correction and elevation-related deviation correction, elevation](#)  
827 [change of stable terrain varies with elevation, slope, and aspect during 1976-2000 and 2000-](#)  
828 [2020.](#)

829 [Figure 3 \(a\), \(b\) and \(c\) After alignment correction and elevation related deviation correction,](#)

~~elevation change of stable terrain varies with elevation, slope, and aspect during 1976–2000;~~  
~~(d), (e) and (f) showed that of 2000–2020.~~

Figure 4 | Glacier distribution in the WNT in the year 1976, 2000, 2009, 2014 and 2020. (a)  
Number and area of glaciers in differently size categoriescategory. (b) The dD  
glacier area with altitude. (c) The dD  
distribution of glacier area with different slope. (d) The  
dD  
distribution of glacier area with different aspects. Data in 2009 came from RGI6.0.

Figure 5 | The distribution of glacier-area change in the WNT from (a) 1976 to 2000, and (b)  
from 2000 to 2020. Figure 5 The distribution of glacier area change in the WNT from 1976 to  
2000 (a), from 2000 to 2020 (b).

Figure 6 | Glacier area changes with (a) time, (b) elevation, (c) slope and (d) aspect.  
Figure 6 Glacier area changes with time (a), elevation (b), slope (c) and aspect (d). The short  
lines on either side of the point indicate the margin of error in figure (a, b, c).

Figure 7 | Mean annual glacier surface elevation changes in the WNT from (a) 1976 to 2000,  
and (b) 2000 to 2020. Figure 7 Mean annual glacier surface elevation changes in the WNT from  
1976 to 2000 (a), from 2000 to 2020 (b). Label I represents the SW section and label II  
represents the NE section of the WNT (on the same scale). The red rectangular box shows an

area of the centra WNT referred to in the paper.

设置了格式: 字体: (中文) Times New Roman, 字体颜色: 文字 1, 不检查拼写或语法

Figure 8 | Glacier elevation change with altitude (m a.s.l) in the whole WNT, inside Nam Co drainage basin and outside Nam Co drainage basin from (a) 1976 to 2000 and (b) 2000 to 2020.

~~Figure 8 Glacier elevation changes in relation to elevation (m a.s.l) in the whole WNT, inside Nam Co drainage basin and outside Nam Co drainage basin from 1976 to 2000 (a), from 2000 to 2020 (b).~~ The dots represent the mean elevation change in each 50-m elevation bin and shaded regions in the altitudinal distributions indicate the uncertainty.

Figure 9 | The distribution of glacier-wide mass balance for individual glaciers ( $> 2 \text{ km}^2$ ) in the WNT from (a) 1976 to 2000 and (b) 2000 to 2020. ~~Figure 9 The distribution of glacier-wide mass balance for individual glaciers ( $> 2 \text{ km}^2$ ) in the WNT from 1976 to 2000 (a), from 2000 to 2020 (b).~~ Label I represents the SW section and label II represents the NE section of the WNT (on the same map scale).

Figure 10 | Glacier elevation change from 1976 to 2000 and from 2000 to 2020 with (a) elevation, (b) slope, and (c) aspect. ~~Figure 10 Glacier elevation changes from 1976 to 2000 and from 2000 to 2020 in relation to elevation (a), slope (b) and aspect (c).~~ The dots in figure (a) represent the mean elevation change in each 50-m bin and shaded region in (a) indicate the uncertainty in the altitudinal distributions. (b) is boxplot of  $dh$  in  $2^\circ$  slope bins and four lines from bottom to top for one box represent minimum value, 25th percentile, 75th percentile, and

874 maximum value, respectively and dots in figure (c) represent the mean elevation change in  
875 each 2-° slope bin. (c) represent the mean elevation change in each 45-° aspect bin.

876  
877 [Figure 11 | Rate of glacier elevation change with elevation of different glaciers types during \(a\)](#)  
878 [1976-2000 and \(b\) 2000-2020.](#) ~~Figure 11 Rate of glacier elevation change with elevation of~~  
879 ~~different type glaciers during 1976-2000 (a), during 2000-2020 (b).~~ Plots represent the  
880 mediums of glacier elevation change in each 50-m elevation bin and shaded regions indicate  
881 the uncertainty in the altitudinal distributions.

882  
883 Figure 12 [\(a\)](#) Glacier elevation change in the WNT during 2000-2014. (b) Glacier elevation  
884 changes ~~in relation to elevation~~ [with altitude](#) in the WNT, inside Nam Co drainage basin and  
885 outside Nam Co drainage basin from 2000 to 2014. The dots represent the mean elevation  
886 change in each 50-m elevation bin and shaded regions indicate the uncertainty in the altitudinal  
887 distributions. (c) Total area of glaciers and that area covered by the datasets during 1976-2000  
888 and 2000-2014.

889  
890 Figure 13 [\(a\)](#) Temperature and precipitation changes for the study area at Damxung, Lhasa and  
891 Bange stations from 1976 to 2020. Annual average temperature and precipitation (a, b),  
892 ablation season (June to September) average temperature and precipitation (c, d), accumulation  
893 season (January to May and October to December) average temperature and precipitation (e,  
894 f).

895

---

896 Figure 14 [Gridded temperature and precipitation change during specific time periods from](#)  
897 [China Meteorological Forcing Data.](#)
